# Supplementary material for: Enhanced reductive removal of ciprofloxacin in pharmaceutical wastewater using biogenic palladium nanoparticles by bubbling H2
Source: Royal Society of Chemistry journal article supplement (doi:10.1039/d0ra03783d), 2020-01-01
Supplement: d0ra03783d1.pdf [file d0ra03783d1.pdf]

## Supporting Information

***Enhanced reductive removal of ciprofloxacin in pharmaceutical  
wastewater using biogenic palladium nanoparticles  
by bubbling H<sub>2</sub>***

*Peipei He<sup>a</sup>, Tianyu Mao<sup>a</sup>, Anming Wang<sup>a\*</sup>, Youcheng Yin<sup>b</sup>,*

*Haoming Chen<sup>a</sup>, Jinying Shen<sup>a</sup>, Pengfei Zhang<sup>a</sup>*

*<sup>a</sup>College of Materials, Chemistry and Chemical Engineering, Hangzhou Normal University,*

*Hangzhou 310014, P. R. China*

*<sup>b</sup>Holistic Integrative Pharmacy Institutes, College of Medicine, Hangzhou Normal University,*

*Hangzhou, Zhejiang, China*

Corresponding author:

Dr. Anming Wang

College of Materials, Chemistry and Chemical Engineering,

Hangzhou Normal University, Hangzhou 310036, P. R. China

TEL: +86-571-28865978; FAX: +86-571-28865630;

E-mail: [waming@hznu.edu.cn](mailto:waming@hznu.edu.cn)

**Table S1 Effect of common ion on Pd<sup>2+</sup> adsorption on *E. coli* cells**

| Ion type                          | Concentration of remained Pd <sup>2+</sup> after adsorption*<br>(mg L <sup>-1</sup> ) |
|-----------------------------------|---------------------------------------------------------------------------------------|
| Pd <sup>2+</sup>                  | 80.61                                                                                 |
| Pd <sup>2+</sup> Ca <sup>2+</sup> | 93.23                                                                                 |
| Pd <sup>2+</sup> Zn <sup>2+</sup> | 85.21                                                                                 |
| Pd <sup>2+</sup> Mg <sup>2+</sup> | 86.13                                                                                 |
| Pd <sup>2+</sup> Na <sup>+</sup>  | 81.33                                                                                 |
| Pd <sup>2+</sup> Cu <sup>2+</sup> | 85.19                                                                                 |

\*The original concentration of Pd<sup>2+</sup> in the wastewater is 200 mg L<sup>-1</sup>.

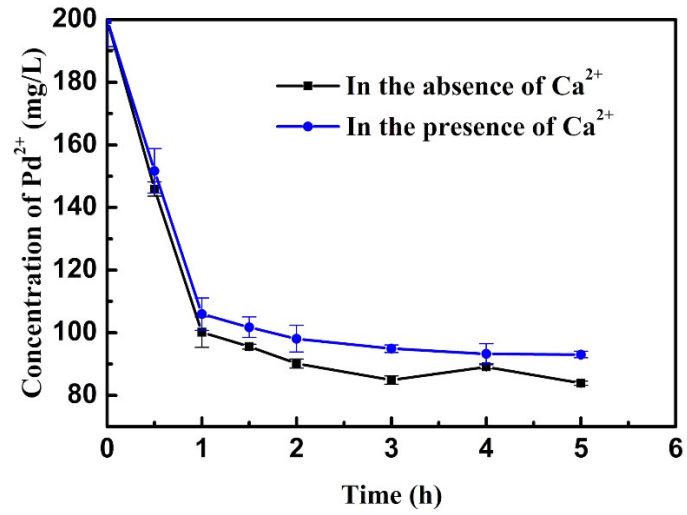

Figure S1 The concentration of remained Pd<sup>2+</sup> after adsorption

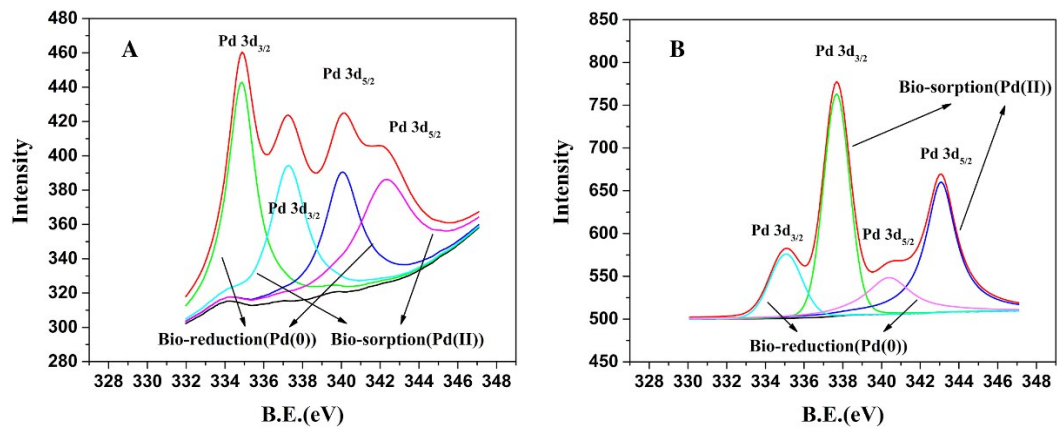

Figure S2 XPS spectra of reduced Pd(0) NPs on *E.coli* cells in the absence (A) and presence (B) of Cu<sup>2+</sup>



0V CIP-02.d

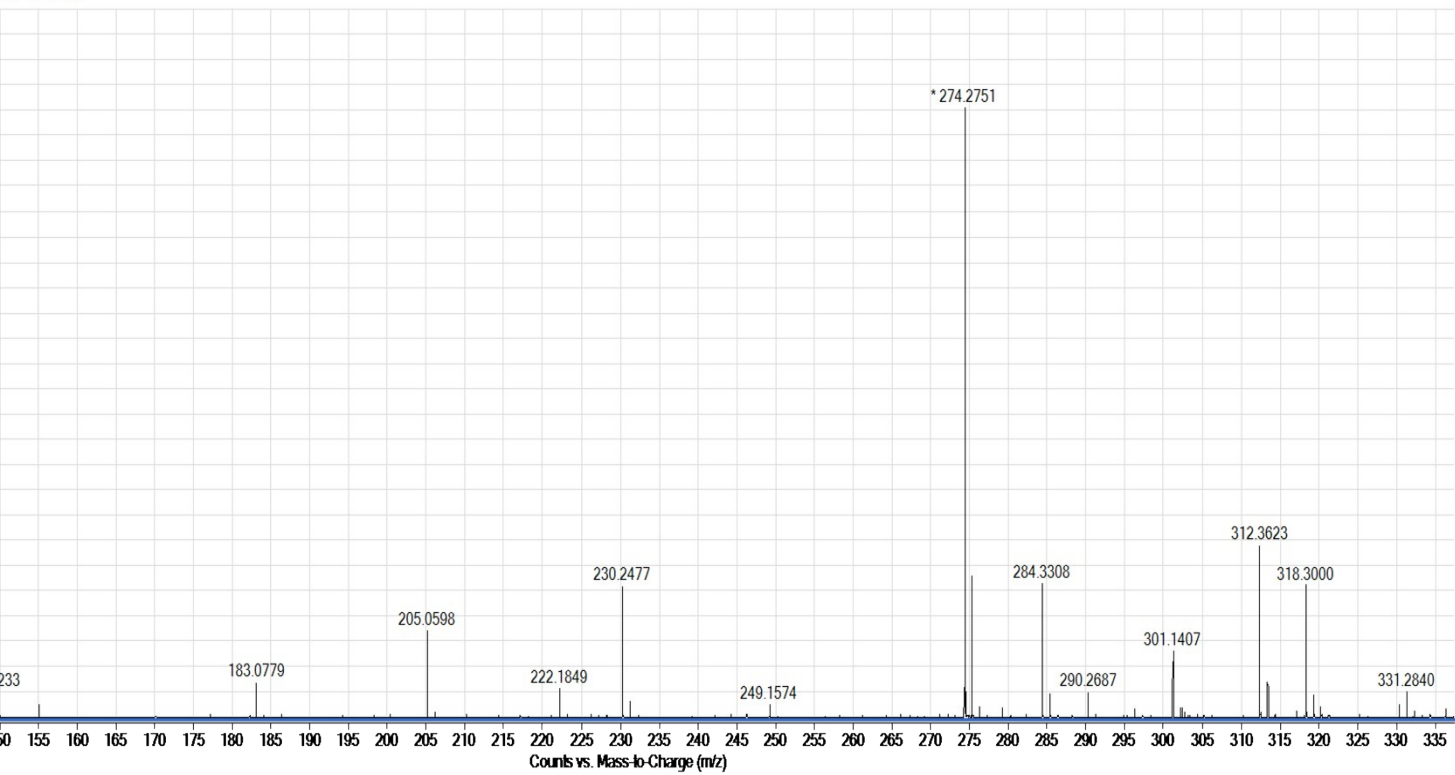

Figure S3 MS acquisition parameters for solution after reaction in positive ion atmospheric pressure chemical ionization

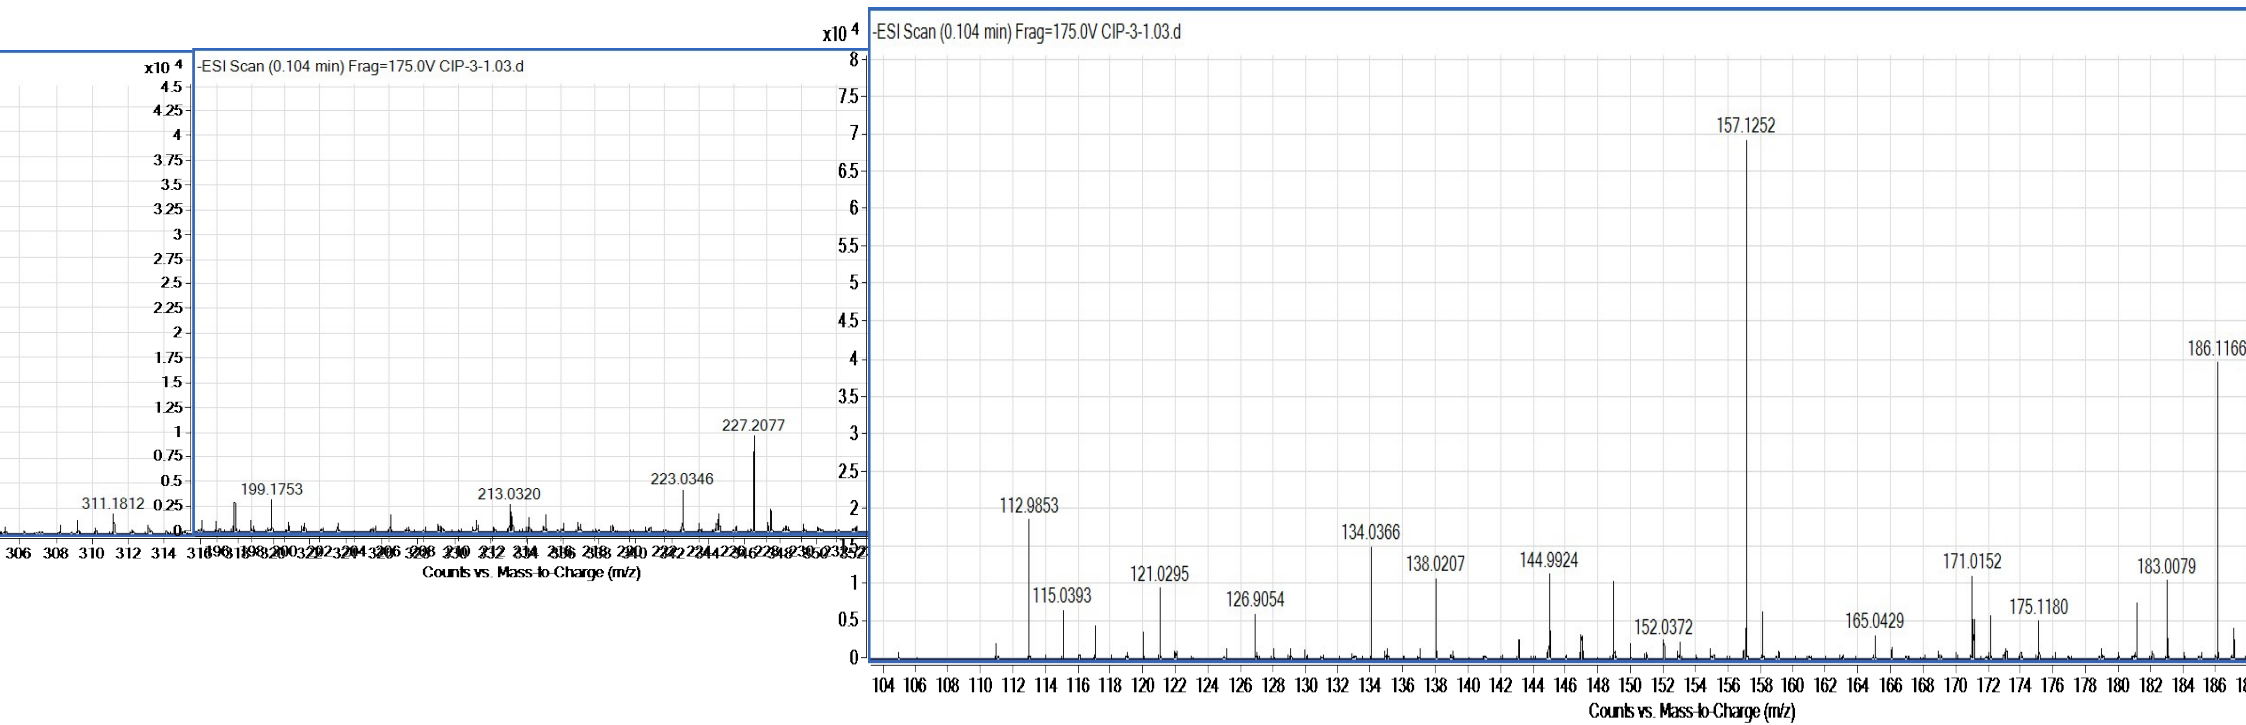

Figure S4 MS acquisition parameters for solution after reaction in negative ion atmospheric pressure chemical ionization
